# Supplementary material
Source: publisher figshare collection journal article supplement (https://acs.figshare.com/ndownloader/files/6675690)
Supplement: Supplementary file 1 [file 6675690]

## **Tuning Hydrogel Properties to Promote the Assembly of Salivary Gland Spheroids in 3D**

Tugba Ozdemir,<sup>1§</sup> Eric W. Fowler,<sup>1§</sup> Shuang Liu,<sup>1</sup> Daniel A. Harrington,<sup>2</sup> Robert L. Witt,<sup>3, 4</sup> Mary C Farach-Carson,<sup>2, 3, 5</sup> Swati Pradhan-Bhatt,<sup>3, 4, 6\*</sup> Xinqiao Jia<sup>1, 3, 6\*</sup>

<sup>1</sup>Department of Materials Science and Engineering, University of Delaware, 210 South College Ave., Newark, DE 19716, USA; <sup>2</sup>Department of BioSciences, Rice University, 6100 Main St., Houston, TX 77005, USA; <sup>3</sup>Department of Biological Sciences, University of Delaware, 210 South College Ave., Newark, DE, 19716, USA; <sup>4</sup>Helen F. Graham Cancer Center and Research Institute, Christiana Care Health Systems, 4701 Ogletown Stanton Rd., Newark, DE, 19713, USA; <sup>5</sup>Department of Bioengineering, Rice University, 6100 Main St., Houston, TX 77005, USA; <sup>6</sup>Department of Biomedical Engineering, University of Delaware, 210 South College Ave., Newark, DE 19716, USA

Number of pages: 7; Number of figures: 3; Number of tables: 2

## Supporting Information

**Synthesis of mono-2-(acryloyloxy)ethyl succinate (AES).** Succinic anhydride (1.05 mmol) was dissolved in 200 mL of anhydrous dichloroethylene. Following dissolution, 2-hydroxyethyl acrylate (HEA, 1.0 mmol) was added. After the vessel was heated to 65 °C and purged with nitrogen, 1-methylimidazole (0.06 mmol) was injected. After 18 h, the reaction mixture was concentrated under reduced pressure to 25 mL. The solution was washed with deionized water, HCl (1.0 M in H<sub>2</sub>O), and saturated NaCl. A trace amount of hydroquinone was added to inhibit polymerization and then the solution was dried over MgSO<sub>4</sub> to yield AES (Yield: 80%).

**Synthesis of HA-AES.** Low molecular weight HA (5 kDa, 500 mg, 1.25 mmol) was dissolved into 30 mL of deionized water and the solution was shaken over Dowex-100 (6.25 mmol) resin for 12 h. The acidic solution was neutralized with 0.2 N tetrabutylammonium hydroxide to pH 7.3–7.6 and lyophilized to produce a dry powder (HA-TBA). HA-TBA and DMAP (0.094 mmol.) were dissolved in 10 mL of anhydrous DMSO under nitrogen. AES (6.25 mmol.) was separately dissolved in 5 mL of anhydrous DMSO and added to the reaction mixture. The flask was heated to 50 °C, Boc<sub>2</sub>O (1.88 mmol.) was added, and the reaction was allowed to proceed for 24 h. The product was precipitated into 50/50 (v/v) hexanes/ethanol then dissolved into deionized water as a slurry with Dowex-50 (6.25 mmol) resin for 12 h. The product was then lyophilized and dissolved at 10 wt% in 2.0 M NaCl and precipitated into ethanol three times. The precipitant was dialyzed for 48 hours in 0.1 M NaCl followed by 24 h in deionized water. Following lyophilization, the product was isolated at a 45% yield while 50% acrylate modification was determined by <sup>1</sup>H NMR.

**Identification of cell surface CD44.** 2D hS/PC cultures were lifted from the culture plate by 15-min incubation with TrypLE™ Express, followed by neutralization with trypsin soybean inhibitor and cell culture media. Cells (1,000,000 cells/mL) were then incubated with either IgG control or APC-conjugated anti-CD44 (0.1 µg/µL) at room temperature in the dark. Fifteen min later, the fluorescently labeled cells were analyzed by flow cytometry (FACS Aria II, BD Biosciences) counting 1,000 events/case. All measurements were performed in triplicate and data was analyzed using FlowJo Software (Ashland, OR). Briefly, the characteristic hS/PC populations were gated based on their forward scatter (FSC-A) and side scatter (SSC-A) dot plots, and the CD44-specific fluorescence intensities of individual cells were then plotted as a histogram against the null IgG labeled cells. To quantify cellular expression of CD44 in 3D, the cell/gel constructs were treated with HAase (10 kU/mL) for 4 h at 37 °C and cells were further dissociated using TrypLE™ Express for 15 min. After achieving a single-cell suspension, the flow cytometry protocol described above was used to quantify the CD44 levels.

**Table S1.** Primary antibodies used for immunofluorescence.

| Target protein           | Vendor                      | Item #     | Host Species | Clone                    | Dilution |
|--------------------------|-----------------------------|------------|--------------|--------------------------|----------|
| $\beta$ -Catenin         | Santa Cruz<br>BioTechnology | SC-7963    | mouse        | Monoclonal<br>(E5)       | 1:100    |
| Caspase-3<br>(activated) | Abcam                       | Ab13847    | rabbit       | Polyclonal               | 1:250    |
| Laminin-1                | Novus                       | NB-300-144 | rabbit       | Polyclonal               | 1:50     |
| Occludin                 | Thermo Fisher               | 33-1500    | mouse        | Monoclonal<br>(OC-3F10)  | 1:100    |
| Cytokeratin 5<br>(K5)    | Biolegend                   | PRB160-P   | rabbit       | Polyclonal               | 1:1000   |
| Cytokeratin 14<br>(K14)  | Abcam                       | Ab49747    | mouse        | Monoclonal<br>(CKB1)     | 1:200    |
| CD44                     | Thermo Fisher               | MA4400     | rat          | Monoclonal<br>(Hermes-1) | 1:100    |
| Collagen IV              | Abcam                       | Ab6586     | rabbit       | Polyclonal               | 1:100    |

**Table S2.** Flow cytometry analysis of CD44 expression by hS/PCs grown on 2D and in 3D DRC18 gels. The characteristic hS/PC population was first gated using FlowJo software based on their sizes. Within the characteristic population, the mean geometric fluorescence intensity of fluorescently labeled CD44 molecules was tabulated.

| Sample  | Mean Geometric Intensity $\pm$ STD |
|---------|------------------------------------|
| IgG 2D  | 333 $\pm$ 91                       |
| CD44 2D | 6,351 $\pm$ 1,051                  |
| IgG 3D  | 280 $\pm$ 23                       |
| CD44 3D | 9,583 $\pm$ 1,237                  |

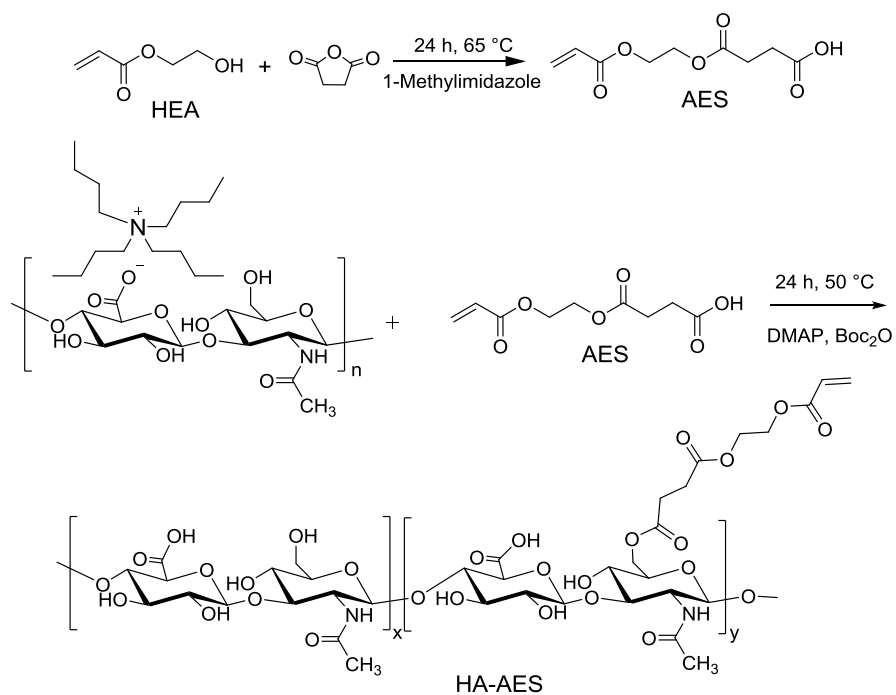

**Scheme S1:** Synthetic pathways for the preparation of HA-AES.

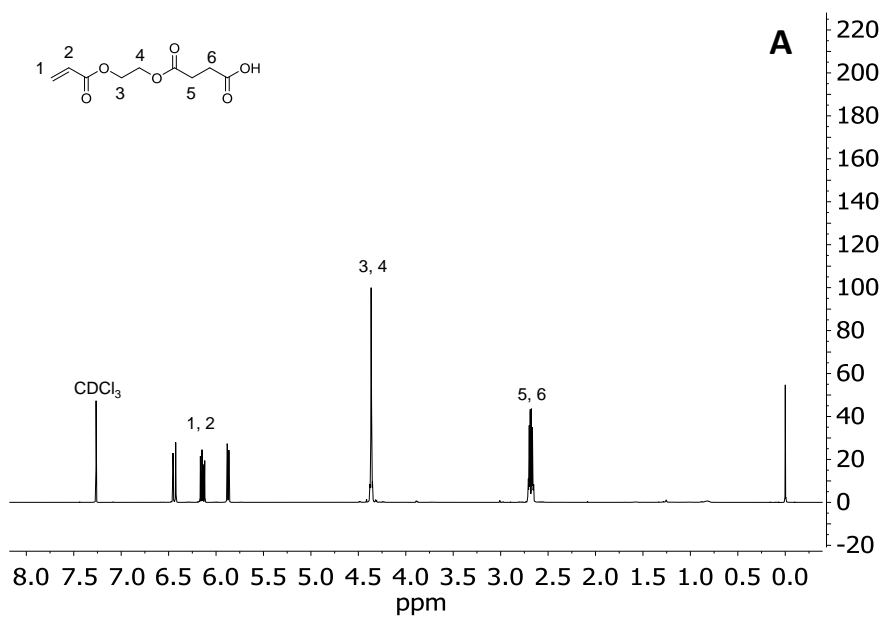

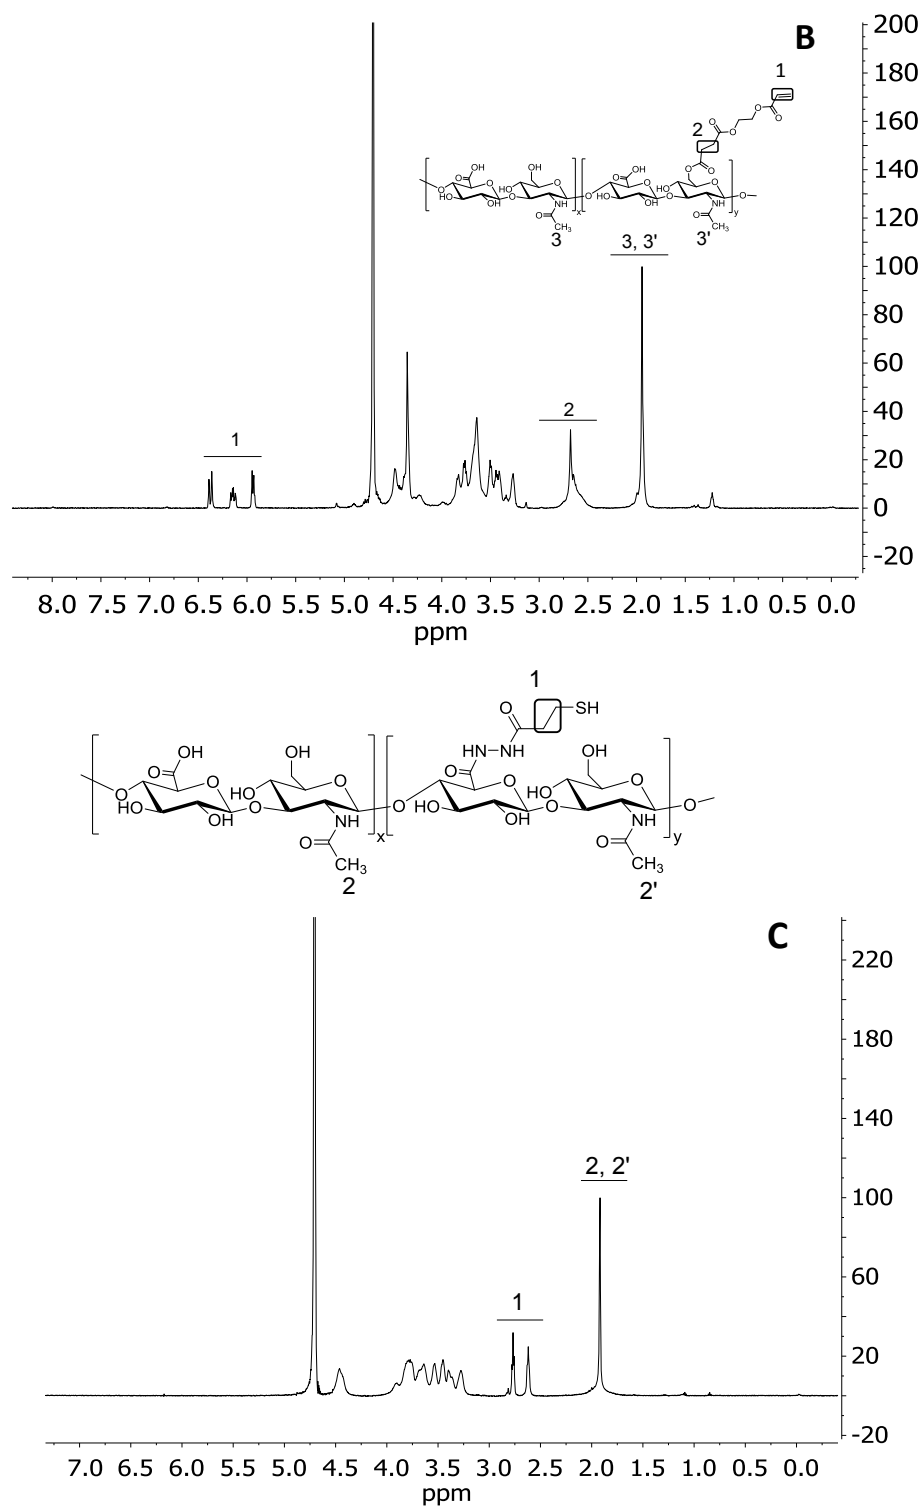

**Figure S1.**  $^1\text{H}$  NMR spectra of AES (A, in  $\text{CDCl}_3$ ), HA-AES (B, in  $\text{D}_2\text{O}$ ) and HA-SH (C, in  $\text{D}_2\text{O}$ )

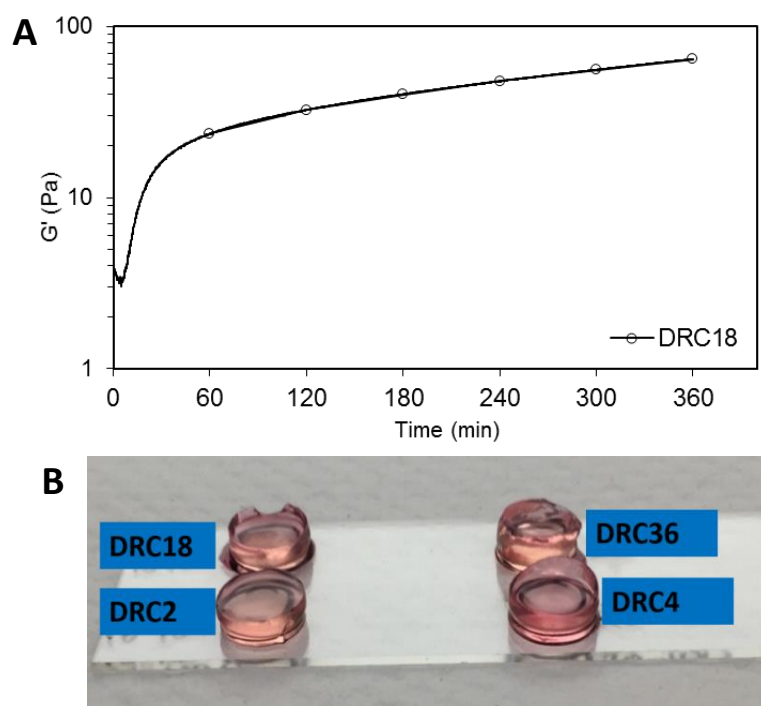

**Figure S2.** Hydrogel stiffening (A) and construct stability (B). (A) Elastic modulus ( $G'$ ) for DRC18 gels as a function of time. Data shown are from 0 to 6 h post mixing. (B) Representative images of cell-laden DRC gels with various thiol/acrylate molar ratios, designated as DRC2, DRC4, DRC18, DRC36, after 28 days of culture.

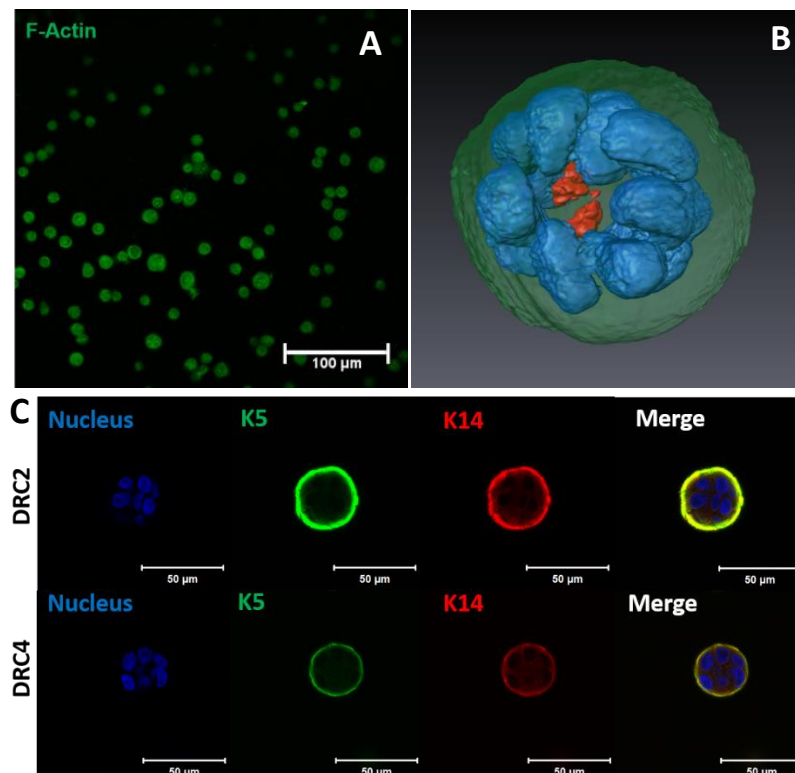

**Figure S3.** Characterization of hS/PC cultures by fluorescent staining and confocal imaging. (A) Confocal image of hS/PCs grown in HA-SH/HA-AM gels for 28 days. This type of HA gels is conducive to the assembly of tumoroids,<sup>1-2</sup> but does not promote the formation of organized spheroids from dispersed hS/PCs after 28 days of culture. F-actin was stained green. (B). 3D reconstructed confocal image of hS/PC spheroids in DRC18 gels showing the presence of PI-positive dead (red) cells in the core of the hS/PC spheroid. SYTO13 positive live (green) cells comprise most of the spheroid. DAPI positive cell nuclei of live cells are seen in blue. Magnification: 25 $\times$ . (C) Expression of progenitor markers (K5, green; K14, red) by hS/PCs grown in DRC2 and DRC4 for 28 days. K5/K14 were stained green and red. Cell nuclei was counter stained blue.

## References

1. Xu, X.; Gurski, L. A.; Zhang, C.; Harrington, D. A.; Farach-Carson, M. C.; Jia, X., Recreating the tumor microenvironment in a bilayer, hyaluronic acid hydrogel construct for the growth of prostate cancer spheroids. *Biomaterials* **2012**, 33 (35), 9049-60.
2. Xu, X.; Sabanayagam, C. R.; Harrington, D. A.; Farach-Carson, M. C.; Jia, X., A hydrogel-based tumor model for the evaluation of nanoparticle-based cancer therapeutics. *Biomaterials* **2014**, 35 (10), 3319-30.
